# Supplementary material
Source: ML conference proceedings conference paper supplement (https://proceedings.mlr.press/v80/liu18f.html)
Supplement: Supplementary file [file liu18f-supp.pdf]

# 1. Appendix

## 1.1. Proof of Lemma 1

It is straight forward to see:

$$\begin{aligned}
\mathbb{E}\bar{H}_{t+1} &= \mathbb{E}\left[\frac{1}{n} \sum_{i=1}^n f_i^\delta(\phi_i^{t+1})\right] = \mathbb{E}\left[\frac{1}{n} \left( \sum_{i \in \mathcal{B}} f_i^\delta(w^t) + \sum_{i \notin \mathcal{B}} f_i^\delta(\phi_i^t) \right)\right] \\
&= \mathbb{E}\left[\mathbb{E}\left[\frac{1}{n} \left( \sum_{i \in \mathcal{B}} f_i^\delta(w^t) + \sum_{i \notin \mathcal{B}} f_i^\delta(\phi_i^t) \right) \middle| \mathcal{B} \right] \middle| |\mathcal{B}| = B\right] \\
&= \frac{1}{n} \left( \frac{\mathbb{E}|\mathcal{B}|}{n} \sum_{i=1}^n f_i^\delta(w^t) + \frac{n - \mathbb{E}|\mathcal{B}|}{n} \sum_{i=1}^n f_i^\delta(\phi_i^t) \right) \\
&= \frac{\mathbb{E}|\mathcal{B}|}{n} f^\delta(w^t) + \frac{n - \mathbb{E}|\mathcal{B}|}{n} \bar{H}_t
\end{aligned}$$

The second line of equality comes from the rule of total expectation, where the inner expectation is taken over the index set  $\mathcal{B}$ , and the outer expectation is taken over the set cardinality  $|\mathcal{B}|$ .

## 1.2. Proof of Lemma 2

The proof technique is similar to SAGA, as well as a useful inequality (Lemma 4 in (?)):

$$\begin{aligned}
f(x) &\geq f(y) + \langle f'(y), x - y \rangle + \frac{1}{2(L - \mu)} \|f'(x) - f'(y)\|^2 \\
&\quad + \frac{\mu L}{2(L - \mu)} \|x - y\|^2 - \frac{\mu}{(L - \mu)} \langle f'(x) - f'(y), x - y \rangle.
\end{aligned} \tag{A1}$$

First of all, by the update rule (2):

$$\begin{aligned}
\|w^{t+1} - w^*\|^2 &= \|\text{Prox}_{\gamma g}(w^t - \gamma G(w^t)) - \text{Prox}_{\gamma g}(w^* - \gamma f'(w^*))\|^2 \\
&\leq \|w^t - \gamma G(w^t) - w^* + \gamma f'(w^*)\|^2 \\
&= \|w^t - w^*\|^2 - 2\gamma \langle w^t - w^*, G(w^t) - f'(w^*) \rangle + \gamma^2 \|G(w^t) - f'(w^*)\|^2.
\end{aligned} \tag{A2}$$

The inequality follows from non-expansiveness of proximal operator, notice that our stochastic gradient  $G(w^t)$  is unbiased, take the expectation to the second term and apply (A1) to each  $f_i$  and the average over all  $i$  will goes to:

$$\begin{aligned}
-\mathbb{E}[\langle w^t - w^*, G(w^t) - f'(w^*) \rangle] &= -\langle w^t - w^*, f'(w^t) - f'(w^*) \rangle \\
&\leq \langle w^t - w^*, f'(w^*) \rangle + \frac{L - \mu}{L} [f(w^*) - f(w^t)] - \frac{\mu}{2} \|w^* - w^t\|^2 \\
&\quad - \frac{1}{2Ln} \sum_{i=1}^n \|f'_i(w^*) - f'_i(w^t)\|^2 - \frac{\mu}{L} \langle f'(w^*), w^t - w^* \rangle.
\end{aligned} \tag{A3}$$

Next we bound the last term in (A2):

$$\begin{aligned}
\mathbb{E} \|f'(w^*) - G(w^t)\|^2 &= \mathbb{E} \left\| f'(w^*) - \frac{1}{|\mathcal{B}|} \sum_{i \in \mathcal{B}} f'_i(w) + \frac{1}{|\mathcal{B}|} \sum_{i \in \mathcal{B}} f'_i(\phi_i^t) - \frac{1}{n} \sum_{i=1}^n f'_i(\phi_i^t) \right\|^2 \\
&= \mathbb{E} \left\| \left[ \frac{1}{n} \sum_{i=1}^n f'_i(w^t) - \frac{1}{|\mathcal{B}|} \sum_{i \in \mathcal{B}} f'_i(w^t) - f'(w^*) + \frac{1}{|\mathcal{B}|} \sum_{i \in \mathcal{B}} f'_i(w^*) \right] \right. \\
&\quad \left. - \left[ \frac{1}{n} \sum_{i=1}^n f'_i(\phi_i^t) - \frac{1}{|\mathcal{B}|} \sum_{i \in \mathcal{B}} f'_i(\phi_i^t) - f'(w^*) + \frac{1}{|\mathcal{B}|} \sum_{i \in \mathcal{B}} f'_i(w^*) \right] \right. \\
&\quad \left. + f'(w^*) - \frac{1}{n} \sum_{i=1}^n f'_i(w^t) \right\|^2 \tag{A4} \\
&\stackrel{*}{=} \mathbb{E} \left\| \left[ \frac{1}{n} \sum_{i=1}^n f'_i(w^t) - \frac{1}{|\mathcal{B}|} \sum_{i \in \mathcal{B}} f'_i(w^t) - f'(w^*) + \frac{1}{|\mathcal{B}|} \sum_{i \in \mathcal{B}} f'_i(w^*) \right] \right. \\
&\quad \left. - \left[ \frac{1}{n} \sum_{i=1}^n f'_i(\phi_i^t) - \frac{1}{|\mathcal{B}|} \sum_{i \in \mathcal{B}} f'_i(\phi_i^t) - f'(w^*) + \frac{1}{|\mathcal{B}|} \sum_{i \in \mathcal{B}} f'_i(w^*) \right] \right\|^2 \\
&\quad + \left\| f'(w^*) - \frac{1}{n} \sum_{i=1}^n f'_i(w^t) \right\|^2.
\end{aligned}$$

In equation  $\stackrel{*}{=}$  we use the property that  $\mathbb{E}[X^2] = \mathbb{E}[X - \mathbb{E}[X]]^2 + \mathbb{E}[X]^2$ , now use the inequality  $\|X + Y\|^2 \leq (1 + \beta)\|X\|^2 + (1 + \beta^{-1})\|Y\|^2$ ,  $\beta > 0$  to the first term:

$$\begin{aligned}
\mathbb{E} \|f'(w^*) - G(w^t)\|^2 &\leq (1 + \beta) \mathbb{E} \left\| \frac{1}{n} \sum_{i=1}^n f'_i(w^t) - \frac{1}{|\mathcal{B}|} \sum_{i \in \mathcal{B}} f'_i(w^t) - f'(w^*) + \frac{1}{|\mathcal{B}|} \sum_{i \in \mathcal{B}} f'_i(w^*) \right\|^2 \\
&\quad + (1 + \beta^{-1}) \mathbb{E} \left\| \frac{1}{n} \sum_{i=1}^n f'_i(\phi_i^t) - \frac{1}{|\mathcal{B}|} \sum_{i \in \mathcal{B}} f'_i(\phi_i^t) - f'(w^*) + \frac{1}{|\mathcal{B}|} \sum_{i \in \mathcal{B}} f'_i(w^*) \right\|^2 \tag{A5} \\
&\quad + \beta \cdot \left\| f'(w^*) - \frac{1}{n} \sum_{i=1}^n f'_i(w^t) \right\|^2.
\end{aligned}$$

Next we bound the first and second terms again by variance decomposition, for simplicity we only take the first term as example:

$$\begin{aligned}
&\mathbb{E} \left\| \frac{1}{n} \sum_{i=1}^n f'_i(w^t) - \frac{1}{|\mathcal{B}|} \sum_{i \in \mathcal{B}} f'_i(w^t) - f'(w^*) + \frac{1}{|\mathcal{B}|} \sum_{i \in \mathcal{B}} f'_i(w^*) \right\|^2 \\
&= \mathbb{E} \left\| \frac{1}{|\mathcal{B}|} \sum_{i \in \mathcal{B}} (f'_i(w^*) - f'_i(w^t)) \right\|^2 - \left\| \frac{1}{n} \sum_{i=1}^n (f'_i(w^*) - f'_i(w^t)) \right\|^2 \\
&\stackrel{(1)}{\leq} \mathbb{E} \left( \frac{1}{|\mathcal{B}|} \sum_{i \in \mathcal{B}} \|f'_i(w^*) - f'_i(w^t)\|^2 \right) - \left\| \frac{1}{n} \sum_{i=1}^n (f'_i(w^*) - f'_i(w^t)) \right\|^2 \tag{A6} \\
&= \frac{1}{n} \sum_{i=1}^n \|f'_i(w^*) - f'_i(w^t)\|^2 - \left\| \frac{1}{n} \sum_{i=1}^n (f'_i(w^*) - f'_i(w^t)) \right\|^2 \\
&\stackrel{(2)}{\leq} \frac{1}{n} \sum_{i=1}^n \|f'_i(w^*) - f'_i(w^t)\|^2,
\end{aligned}$$

(1)  $\leq$  is by RMS-AM inequality, and in (2)  $\leq$  we drop the negative term. Similarly,

$$\mathbb{E} \left\| \frac{1}{n} \sum_{i=1}^n f'_i(\phi_i^t) - \frac{1}{|\mathcal{B}|} \sum_{i \in \mathcal{B}} f'_i(\phi_i^t) - f'(w^*) + \frac{1}{|\mathcal{B}|} \sum_{i \in \mathcal{B}} f'_i(w^*) \right\|^2 \leq \frac{1}{n} \sum_{i=1}^n \|f'_i(w^*) - f'_i(\phi_i^t)\|^2.$$

Plug (A6) into (A5) we get:

$$\mathbb{E} \|f'(w^*) - G(w^t)\|^2 \leq \frac{(1+\beta)}{n} \sum_{i=1}^n \|f'_i(w^*) - f'_i(w^t)\|^2 + \frac{(1+\beta^{-1})}{n} \sum_{i=1}^n \|f'_i(w^*) - f'_i(\phi_i^t)\|^2 - \beta \|f'(w^t) - f'(w^*)\|^2. \quad (\text{A7})$$

Combining (A2),(A3),(A7) becomes (5) immediately:

$$\begin{aligned} \|w^t - w^*\|^2 - \mathbb{E}\|w^{t+1} - w^*\|^2 &\geq \gamma\mu \|w^t - w^*\|^2 - (2\gamma^2 - \gamma/L)\mathbb{E}\|f'_i(w^t) - f'_i(w^*)\|^2 \\ &\quad + \gamma^2 \|f'(w^t) - f'(w^*)\|^2 + \frac{2\gamma(L-\mu)}{L} f^\delta(w^t) - 4\gamma^2 L \bar{H}_t. \end{aligned}$$

### 1.3. Proof of Theorem 3

It follows directly from Lemma 1 and 2:

$$\begin{aligned} \mathcal{L}_t - \mathbb{E}\mathcal{L}_{t+1} &= c(\bar{H}_t - \mathbb{E}\bar{H}_{t+1}) + (\|w^t - w^*\|^2 - \mathbb{E}\|w^{t+1} - w^*\|^2) \\ &\geq c \left( \frac{\mathbb{E}|\mathcal{B}|}{n} - \frac{2(1+\beta^{-1})\gamma^2 L}{c} \right) \bar{H}_t + \gamma\mu \|w^t - w^*\|^2 + (2\mu\beta\gamma^2 + \frac{2\gamma(L-\mu)}{L} - \frac{c \cdot \mathbb{E}|\mathcal{B}|}{n}) f^\delta(w^t) \\ &\quad + \left( \frac{\gamma}{L} - (1+\beta)\gamma^2 \right) \mathbb{E}\|f'_i(w^t) - f'(w^*)\|^2 \\ &\stackrel{?}{\geq} c \left( \frac{|\mathcal{B}|}{n} - \frac{2(1+\beta^{-1})\gamma^2 L}{c} \right) \bar{H}_t + \gamma\mu \|w^t - w^*\|^2 \\ &\geq \rho \mathcal{L}_t, \end{aligned} \quad (\text{A8})$$

where  $\rho = \min(\frac{|\mathcal{B}|}{n} - \frac{2(1+\beta^{-1})\gamma^2 L}{c}, \gamma\mu)$ , the last inequality  $\stackrel{?}{\geq}$  comes with following condition:

$$\begin{aligned} 2\mu\beta\gamma^2 + \frac{2\gamma(L-\mu)}{L} - \frac{c|\mathcal{B}|}{n} &\geq 0 \\ \frac{\gamma}{L} - (1+\beta)\gamma^2 &\geq 0, \end{aligned} \quad (\text{A9})$$

furthermore, to keep our algorithm moving forward, i.e.  $\|w^t - w^*\|^2$  decreasing, we should also make sure such condition hold:

$$\frac{|\mathcal{B}|}{n} - \frac{2(1+\beta^{-1})\gamma^2 L}{c} \geq 0. \quad (\text{A10})$$

### 1.4. Proof of Proposition 1

By plugging  $\beta = 2$ ,  $c = \frac{n}{3L\mathbb{E}|\mathcal{B}|}$  into (A9) it is easy to verify both inequalities hold.

### 1.5. Proof of Proposition 2

In this case we choose  $\beta = 1$ . From Theorem 3 we know that with a suitable step size  $\gamma$  and  $c$ , we have:

$$\mathbb{E}\|w^t - w^*\|^2 \leq \mathbb{E}\mathcal{L}_t \leq (1-\rho)^t \mathcal{L}_0 = (1-\rho)^t [\|w^0 - w^*\|^2 + c\bar{H}_0].$$

For the optimal convergence rate, we try to maximize the geometric factor  $\rho = \min(\frac{\mathbb{E}|\mathcal{B}|}{n} - \frac{4\gamma^2 L}{c}, \gamma\mu)$ . Denote  $\gamma_0$  as the solution of:  $\frac{\mathbb{E}|\mathcal{B}|}{n} - \frac{4\gamma_0^2 L}{c} = \gamma_0\mu$ . Notice that  $\rho(\gamma) = \gamma\mu$  is increasing with  $\gamma$  when  $\gamma \leq \gamma_0 = \frac{c}{8\kappa} \left( \sqrt{1 + \frac{16\kappa\mathbb{E}|\mathcal{B}|}{cn\mu}} - 1 \right)$

and  $\rho(\gamma) = \frac{\mathbb{E}|\mathcal{B}|}{n} - \frac{4\gamma^2 L}{c}$  is decreasing when  $\gamma > \gamma_0$ . So the optimal step size should be  $\gamma = \gamma_0$ . However we should also verify that this step size indeed satisfies the condition in (A9). First of all:

$$\gamma_0 = \frac{c}{8\kappa} \left( \sqrt{1 + \frac{16\kappa\mathbb{E}|\mathcal{B}|}{cn\mu}} - 1 \right) \stackrel{(1)}{\leq} \frac{c}{8\kappa} \sqrt{\frac{16\kappa\mathbb{E}|\mathcal{B}|}{cn\mu}} = \sqrt{\frac{c\mathbb{E}|\mathcal{B}|}{4nL}} \stackrel{(2)}{\leq} \frac{1}{2L}. \quad (\text{A11})$$

(1) comes from the fact that  $\sqrt{1+x} - 1 \leq \sqrt{x}$ , (2) holds by choosing  $c = \frac{\tau n}{L\mathbb{E}|\mathcal{B}|}$ , where  $\tau < 1$  is a small constant. These two inequalities together ensure the upper bound part of (A9). As to the lower bound, we have  $\sqrt{1+x} - 1 > \sqrt{x} - 1$ , so:

$$\gamma_0 > \frac{c}{8\kappa} \left( \sqrt{\frac{16\kappa\mathbb{E}|\mathcal{B}|}{cn\mu}} - 1 \right) \geq \frac{c\mathbb{E}|\mathcal{B}|L}{2n(L-\mu)} \implies \tau \leq \left( \frac{1}{\frac{L}{L-\mu} + \frac{n}{4\kappa\mathbb{E}|\mathcal{B}|}} \right)^2 < 1.$$

So if we choose  $\tau$  properly, both sides of (A9) can be satisfied.

## 1.6. Proof of Corollary 1, 2

Following (7) we take a derivative to  $\mathbb{E}|\mathcal{B}|$ :

$$\frac{\partial f(\mathbb{E}|\mathcal{B}|)}{\partial \mathbb{E}|\mathcal{B}|} = \frac{(\alpha\mathbb{E}|\mathcal{B}| - 1)^2 \mathbb{E}|\mathcal{B}|}{\sqrt{1 + \alpha^2 \mathbb{E}|\mathcal{B}|^2} (\sqrt{1 + \alpha^2 \mathbb{E}|\mathcal{B}|^2} - 1)^2} \geq 0, \quad (\text{A12})$$

where  $\alpha = \frac{4\kappa}{\sqrt{\tau n}}$ , so there is no optimal batch size, and since we always want to access one data point, i.e.  $|\mathcal{B}| \geq 1$  and SAGA style update is optimal.

For Corollary 2, it is easy to see for our algorithm, which choose  $|\mathcal{B}| = n$  with probability  $p \ll 1$  and  $|\mathcal{B}| = 1$  with probability  $1 - p$ , has average batch size  $\mathbb{E}|\mathcal{B}| = np + 1 - p \approx np + 1$ . For each update, it takes on average time  $\tau = n\eta\tau p + (1-p)\tau \approx (1 + n\eta)\tau$ . If we want to get a  $\epsilon$ -suboptimal solution, the total iteration will be  $N = \frac{\log(\epsilon/\epsilon_0)}{\log(1-\rho)} \propto 1/\rho$ , So the running time will be:

$$\begin{aligned} T &\propto \frac{1 + n\eta}{\sqrt{\frac{1}{\mathbb{E}|\mathcal{B}|^2} + \frac{16\kappa^2}{\tau n^2} - \frac{1}{\mathbb{E}|\mathcal{B}|}}} \\ &\approx \frac{(\mathbb{E}|\mathcal{B}|^2 - \mathbb{E}|\mathcal{B}|)\eta + \mathbb{E}|\mathcal{B}|}{\sqrt{1 + \alpha^2 \mathbb{E}|\mathcal{B}|^2} - 1}. \end{aligned} \quad (\text{A13})$$

For simplicity we denote  $B = \mathbb{E}|\mathcal{B}|$ . By taking the partial derivative and set it to zero  $\partial T / \partial B = 0$  can solve the best batch size:

$$((2B - 1)\eta + 1)(\sqrt{1 + \alpha^2 B^2} - 1) = ((B^2 - B)\eta + B) \frac{\alpha^2 B}{\sqrt{1 + \alpha^2 B^2}}, \quad (\text{A14})$$

after solving the above equation we get:

$$B = \left( \frac{1}{\eta} - 1 \right) \left( \frac{\xi - 1}{2 - \xi} \right), \quad \xi = \frac{\alpha^2 B^2}{1 + \alpha^2 B^2 - \sqrt{1 + \alpha^2 B^2}}. \quad (\text{A15})$$

By showing the second order derivative  $\partial^2 T / \partial B^2 \geq 0$  it's easy to verify that this solution is actually a global minimum.

## 1.7. Proof of Lemma 4

We begin with non-expansiveness of proximal operation:

$$\begin{aligned} \|w^{t+1} - w^*\|^2 &= \|\text{Prox}_{\gamma g}(w^t - \gamma G(w^t)) - \text{Prox}_{\gamma g}(w^* - \gamma f'(w^*))\|^2 \\ &\leq \|w^t - \gamma G(w^t) - w^* + \gamma f'(w^*)\|^2 \\ &= \|w^t - w^*\|^2 - 2\gamma \langle w^t - w^*, G(w^t) - f'(w^*) \rangle + \gamma^2 \|G(w^t) - f'(w^*)\|^2, \end{aligned} \quad (\text{A16})$$

where  $f(w) = \frac{1}{n} \sum_{i=1}^n f_i(w)$  By taking expectation on each side and notice  $G(w^t)$  is a unbiased estimation of  $f'(w^t)$ :

$$\mathbb{E}\|w^{t+1} - w^*\|^2 = \|w^t - w^*\|^2 - 2\gamma \langle w^t - w^*, f'(w^t) - f'(w^*) \rangle + \gamma^2 \mathbb{E}\|G(w^t) - f'(w^*)\|^2, \quad (\text{A17})$$

and then apply the following bounds for strongly convex function  $f$ :

$$\begin{aligned} \langle w^t - w^*, f'(w^t) - f'(w^*) \rangle &\geq \mu \|w^t - w^*\|^2 \\ \langle w^t - w^*, f'(w^t) - f'(w^*) \rangle &\geq \frac{1}{L} \|f'(w^t) - f'(w^*)\|^2, \end{aligned} \quad (\text{A18})$$

so the inner product term have a composite upper bound:

$$-2\gamma \langle w^t - w^*, f'(w^t) - f'(w^*) \rangle \leq -\gamma(\mu \|w^t - w^*\|^2 + \frac{1}{L} \|f'(w^t) - f'(w^*)\|^2) \quad (\text{A19})$$

on the other hand, we can bound  $\mathbb{E}\|G(w^t) - f'(w^*)\|^2$  as (A5) but we only need to care about one sample in a batch case, since we are comparing SAGA with SVRG update style:

$$\mathbb{E}\|G(w^t) - f'(w^*)\|^2 \leq 2\mathbb{E}\|f'_i(\phi_i^t) - f'_i(w^*)\|^2 + 2\mathbb{E}\|f'_i(w^t) - f'_i(w^*)\|^2 - \|f'(w^t) - f'(w^*)\|^2. \quad (\text{A20})$$

Remember we have proved above formula in (A7), for  $\mathbb{E}\|f'_i(w^t) - f'_i(w^*)\|^2$  we have:

$$\begin{aligned} \mathbb{E}\|f'_i(w^t) - f'_i(w^*)\|^2 &\leq \frac{2L}{n} \sum_{i=1}^n f_i(w^t) - f_i(w^*) - f'_i(w^*)^\top (w^t - w^*) \\ &= 2L(f(w^t) - f(w^*) - f'(w^*)^\top (w^t - w^*)). \end{aligned} \quad (\text{A21})$$

Similarly, for  $\|f'(w^t) - f'(w^*)\|^2$  we recall  $f$  is a  $\mu$ -strongly convex function:

$$\|f'(w^t) - f'(w^*)\|^2 \geq 2\mu(f(w^t) - f(w^*) - f'(w^*)^\top (w^t - w^*)). \quad (\text{A22})$$

Add those inequalities together:

$$\mathbb{E}\|w^{t+1} - w^*\|^2 \leq (1 - \gamma\mu)\|w^t - w^*\|^2 + (4L\gamma^2 - \frac{2\mu\gamma}{L} - 2\mu\gamma^2)f^\delta(w^t) + 2\gamma^2\mathbb{E}\|f'_i(\phi_i^t) - f'_i(w^*)\|^2. \quad (\text{A23})$$

### 1.8. Proof of Lemma 5

Since we know the distribution of random variable  $\tau$ , also denote  $t_s$  as the index of the latest gradient snapshot so for SVRG/SAGA++  $t_s = kT$  where  $k$  is the number of outer iteration and  $T$  is the length of inner iteration, for SAGA  $t_s = 0$  so in either method we have  $t_s \geq 0$  then by conditional expectation relationship:

$$\begin{aligned} \mathbb{E}[\|\alpha_i - f'_i(w^*)\|^2 | \mathcal{F}_0] &\stackrel{(1)}{=} \frac{1}{n} \sum_{k=1}^n \mathbb{E}[\|\alpha_k - f'_k(w^*)\|^2 | \mathcal{F}_{t_s}] \\ &\stackrel{(2)}{=} \frac{1}{n} \sum_{k=1}^n \sum_{l=t_s}^t p_l \|f'_k(w^l) - f'_k(w^*)\|^2 \\ &= \sum_{l=t_s}^t p_l \frac{1}{n} \sum_{k=1}^n \|f'_k(w^l) - f'_k(w^*)\|^2 \\ &\leq 2L \sum_{l=t_s}^t p_l (f(w^l) - f(w^*) - f'(w^*)^\top (w^l - w^*)), \end{aligned} \quad (\text{A24})$$

$\stackrel{(1)}{=}$  is taken over the choices of  $i$ , while  $\stackrel{(2)}{=}$  is taken over the random variable  $\tau$  in  $\alpha_k = f'_k(w^\tau)$ . Because the regularization function  $g(w)$  is convex, and from optimal condition we know:  $-f'(w^*) \in \partial g(w^*)$ , we have:

$$\begin{aligned} f(w^l) - f(w^*) - f'(w^*)^\top (w^l - w^*) &= f(w^l) - f(w^*) + v^l (w^l - w^*) \\ &\leq f(w^l) - f(w^*) + g(w^l) - g(w^*) \\ &= F(w^l) - F(w^*), \end{aligned} \quad (\text{A25})$$

where  $v^l \in \partial g(w^l)$ . Finally we have  $\mathbb{E}[\|\alpha_i - f'_i(w^*)\|^2 | \mathcal{F}_0] \leq 2L \sum_{l=t_s}^t p_l (F(w^l) - F(w^*)).$

### 1.9. Proof of Proposition 3

Recall the quadratic upper bound of  $L$ -Lipschitz function:

$$f(w^t - \gamma G(w^t)) \leq f(w^t) - \gamma \nabla f^\top(w^t) G(w^t) + \frac{L\gamma^2}{2} \|G(w^t)\|^2. \quad (\text{A26})$$

By taking the expectation,

$$\begin{aligned} \mathbb{E}[f(w^t - \gamma G(w^t)) | \mathcal{F}_t] &\leq f(w^t) - \gamma \| \nabla f(w^t) \|^2 + \frac{L\gamma^2}{2} \mathbb{E}[\|G(w^t)\|^2 | \mathcal{F}_t] \\ &\leq f(w^t) - (\gamma - \frac{L\gamma^2}{2}) \| \nabla f(w^t) \|^2 + \frac{L\gamma^2}{2} \text{Var}[G(w^t)]. \end{aligned} \quad (\text{A27})$$

On the other hand, for  $\mu$ -strongly convex  $f$ , we have:

$$\| \nabla f(w^t) \|^2 \geq 2\mu(f(w^t) - f^*), \quad (\text{A28})$$

so if  $\text{Var}[G(w^t)]$  also converges to zero at the order of  $f^{\text{sub}}(w^t) = f(w^t) - f^*$  then  $\gamma$  can keep to a small constant rather than damping like SGD. In fact (?) (Corollary 3) already proved it for SVRG, here we prove a similar result for SAGA style update:

$$\begin{aligned} \text{Var}[G(w^t) | \mathcal{F}_s] &= \mathbb{E} \left[ \left\| \nabla f_{i_k}(w^t) - \nabla f_{i_k}(\phi_{i_k}^t) - \frac{1}{n} \sum_{j=1}^n (\nabla f_j(w^t) - \nabla f_j(\phi_j^t)) \right\|^2 \middle| \mathcal{F}_s \right] \\ &= \mathbb{E} \left[ \left\| \nabla f_{i_k}(w^t) - \nabla f_{i_k}(\phi_{i_k}^t) \right\|^2 \middle| \mathcal{F}_s \right] - \left\| \frac{1}{n} \sum_{j=1}^n (\nabla f_j(w^t) - \nabla f_j(\phi_j^t)) \right\|^2 \\ &\leq \mathbb{E} \left[ \mathbb{E} \left[ \left\| \nabla f_{i_k}(w^t) - \nabla f_{i_k}(\phi_{i_k}^t) \right\|^2 \middle| \mathcal{F}_t, \mathcal{F}_s \right] \right] \\ &= \frac{2}{n} \sum_{j=1}^n \mathbb{E} [\| \nabla f_j(w^t) - \nabla f_j(w^*) \|^2 | \mathcal{F}_s] + \frac{2}{n} \sum_{j=1}^n \mathbb{E} [\| \nabla f_j(\phi_j^t) - \nabla f_j(w^*) \|^2 | \mathcal{F}_s] \\ &\leq 4L(\mathbb{E}[f(w^t) | \mathcal{F}_s] - f(w^*)) + \frac{4L}{n} \sum_{j=1}^n \sum_{\tau=s}^t p_\tau (\mathbb{E}[f_j(w_\tau) | \mathcal{F}_s] - f_j(w^*)) \\ &= 4L(\mathbb{E}[f(w^t) | \mathcal{F}_s] - f(w^*)) + 4L \sum_{\tau=s}^t p_\tau (\mathbb{E}[f(w_\tau) | \mathcal{F}_s] - f(w^*)), \end{aligned} \quad (\text{A29})$$

here  $\{\mathcal{F}_t\}_{t \geq 0}$  is the filtered probability space,  $t - T \leq s \leq t$  (recall  $T$  is the length of inner iteration) is the latest available full gradient time stamp,  $p_\tau$  is the probability distribution of stored gradient discussed in (10). Since  $t - s$  is upper bounded (this is true for SVRG/SAGA++, as to SAGA, the expectation is  $n \log n$  by ‘‘Coupon collection problem’’), together with linear convergence, we know the second term is close to the first term up to a constant.

### 1.10. Proof of Theorem 6

First of all, we have the following recursive formula:

$$\begin{aligned} P_g(x, \eta, c, n) &= \text{Prox}_g(P_g(x, \eta, c, n - 1) - c) \\ &= \begin{cases} P(x, \eta, c, n - 1) - c - \eta, & \text{if } P(x, \eta, c, n - 1) \geq c + \eta \\ 0, & \text{if } c - \eta \leq P(x, \eta, c, n - 1) \leq c + \eta \\ P(x, \eta, c, n - 1) - c + \eta, & \text{if } P(x, \eta, c, n - 1) \leq c - \eta \end{cases} \end{aligned} \quad (\text{A30})$$

Because  $c$  can be either positive or negative but  $\eta$  is always positive, we consider about following cases:

- ( $c < -\eta$ ) In this case  $0 > c + \eta > c - \eta$ , if:

- 
1.  $x \geq c + \eta$ , then  $P(x, \eta, c, n) = x - n(c + \eta)$ ;
  2.  $x < c + \eta$ , then suppose  $x = q(c - \eta) + \epsilon$ ,  $q \in \mathbb{N}$ ,  $\epsilon \in [c - \eta, c + \eta]$ , if  $q \geq n$  then  $P(x, \eta, c, n) = x - n(c - \eta)$ ; else  $P(x, \eta, c, q) = \epsilon$ ,  $P(x, \eta, c, q + 1) = 0$ ,  $P(x, \eta, c, n) = -(n - q - 1)(c + \eta)$ .

• ( $c > \eta$ ) In this case  $0 < c - \eta < c + \eta$  which is symmetric to previous case, if:

1.  $x \leq c - \eta$ , then  $P(x, \eta, c, n) = x - n(c - \eta)$ ;
2.  $x > c - \eta$ , then suppose  $x = q(c + \eta) + \epsilon$ ,  $q \in \mathbb{N}$ ,  $\epsilon \in [c - \eta, c + \eta]$ , if  $q \geq n$  then  $P(x, \eta, c, n) = x - n(c - \eta)$ ; else  $P(x, \eta, c, q) = \epsilon$ ,  $P(x, \eta, c, q + 1) = 0$ ,  $P(x, \eta, c, n) = -(n - q - 1)(c - \eta)$ .

• ( $-\eta \leq c \leq \eta$ ) finally,  $c - \eta \leq 0 \leq c + \eta$ , if:

1.  $x \geq n(c + \eta)$ , then  $P(x, \eta, c, n) = x - n(c + \eta)$ ;
2.  $x \leq n(c - \eta)$ , then  $P(x, \eta, c, n) = x + n(c - \eta)$ ;
3. otherwise,  $\lfloor \frac{x}{c + \eta} \rfloor < n$  or  $\lfloor \frac{-x}{-c + \eta} \rfloor < n$  then we know it will eventually be zero:  $P(x, \eta, c, n) = 0$ .

Clearly this is a piecewise linear function with tangent either 1 or 0.

### 1.11. $\ell_2$ Logistic Regression Experiment

In this supplemental experiment, we conduct the  $\ell_2$  logistic regression experiment, formulated as follows

$$w^* = \arg \min_w \frac{1}{n} \sum_{i=1}^n \log(1 + \exp(y_i x_i^T w)) + \frac{\lambda}{2} \|w\|_2^2. \quad (\text{A31})$$

The datasets and settings are the same as  $\ell_1$  experiment discussed in the main text. The experiment result is exhibited in Figure 1.

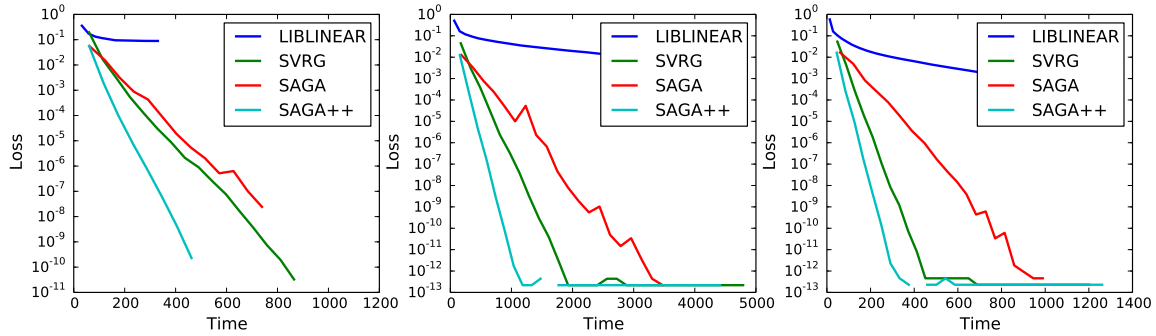

Figure 1. Running time comparison among different data ( $\lambda = 1.0 \times 10^{-7}$  for all data).
